# Supplementary material for: Non-Clinical Factors Determining the Prescription of Antibiotics by Veterinarians: A Systematic Review
Source: MDPI journal article supplement (doi:10.3390/antibiotics10020133), 2021-01-30
Supplement: s1 [file s1]

**Table S1 Study of assessment of quality and susceptibility to bias of quantitative and mixed studies: AXIS tool.**

| Author          | Year | AXIS criterion |   |   |   |   |   |   |   |    |    |    |    |    |    |    |    |    |    |    |    |
|-----------------|------|----------------|---|---|---|---|---|---|---|----|----|----|----|----|----|----|----|----|----|----|----|
|                 |      | 1              | 2 | 3 | 4 | 5 | 6 | 7 | 8 | 9  | 10 | 11 | 12 | 13 | 14 | 15 | 16 | 17 | 18 | 19 | 20 |
| Eriksen 55      | 2019 |                |   |   |   |   |   |   |   |    |    |    |    |    |    |    |    |    |    |    |    |
| Hopman 54       | 2019 |                |   |   |   |   |   |   |   |    |    |    |    |    | X  |    |    |    |    |    |    |
| Doidge 29       | 2019 |                |   |   |   |   |   |   |   |    |    |    |    |    |    |    |    |    |    |    |    |
| Norris 37       | 2019 |                |   |   |   |   |   |   |   |    |    |    |    |    |    |    |    |    |    |    |    |
| Carmo 57        | 2018 |                |   |   |   |   |   | ? |   | NA |    |    |    |    | X  |    |    |    |    |    |    |
| Scherpenzeel 24 | 2018 |                |   |   |   |   |   |   |   |    |    |    |    |    | X  |    |    |    | ?  |    |    |
| Coyne 34        | 2018 |                |   |   |   |   |   | ? |   |    |    |    |    |    | X  |    |    |    |    |    |    |
| Zhuo 35         | 2018 |                |   |   |   |   |   |   |   |    |    |    |    | X  |    |    |    |    |    |    |    |
| Kumar 36        | 2018 |                |   |   |   |   |   | ? |   |    |    |    |    | ?  |    |    |    |    |    |    |    |
| Ekakoro 27      | 2018 |                |   |   |   |   |   |   |   |    |    |    |    |    | X  |    | X  |    |    |    |    |
| Hardefeldt 52   | 2018 |                |   |   |   |   |   | ? |   |    |    |    |    |    | X  |    |    |    |    |    |    |
| Barbarossa 32   | 2017 |                |   | X |   |   |   | X |   |    |    |    |    |    | X  |    |    |    | X  |    |    |
| Anyanwu 25      | 2017 |                |   |   |   |   |   | ? |   |    |    |    |    |    | X  |    |    |    |    |    |    |
| Postma 36       | 2016 |                |   |   |   |   |   | ? |   |    |    |    |    |    | X  |    |    |    |    |    |    |
| Mc Dougall 28   | 2016 |                |   | ? |   |   |   |   |   |    |    |    |    |    | X  |    | X  |    |    |    |    |
| Visschers 26    | 2015 |                |   | ? |   |   |   | ? |   |    |    |    |    | ?  | X  |    |    |    |    |    |    |
| Speksnijder 33  | 2015 |                |   |   |   |   |   |   |   |    |    |    |    |    |    |    |    |    |    |    |    |
| De Briyne 38    | 2013 |                |   |   |   |   |   | X |   |    |    |    |    | X  | X  |    |    |    |    |    |    |
| Gibbons 30      | 2012 |                |   |   |   |   |   |   |   |    |    |    |    |    |    |    |    |    |    |    |    |
| Hughes 31       | 2011 |                |   |   |   |   |   |   |   |    |    |    |    |    | X  |    |    |    |    |    |    |

Empty cell: The study complied with this exploratory question.

Cell marked with X: The study did not comply with this exploratory question.

Cell marked with ?: We do not know whether the study complied with this exploratory question.

Cell marked with NA: This exploratory question could not be appraised in this study.

**Table S2. Quality assessment table in respect of qualitative studies: Critical Appraisal Skills Programme (CASP)**

| Author         | Year | CASP criterion |    |   |   |   |   |   |   |   |          |
|----------------|------|----------------|----|---|---|---|---|---|---|---|----------|
|                |      | 1*             | 2* | 3 | 4 | 5 | 6 | 7 | 8 | 9 | 10       |
| Golding 49     | 2019 |                |    |   |   |   |   |   | X |   | valuable |
| Pucken 51      | 2019 |                |    |   |   |   |   |   |   |   | valuable |
| Hopman 39      | 2018 |                |    |   |   |   |   |   |   |   | valuable |
| Smith 40       | 2018 |                |    |   | X |   | X |   |   |   | valuable |
| King 41        | 2018 |                |    |   |   |   | ? |   |   |   | valuable |
| Chauhan 44     | 2018 |                |    |   |   |   |   |   |   |   | valuable |
| OM 43          | 2017 |                |    |   |   |   |   |   |   |   | valuable |
| Higgins 42     | 2016 |                |    |   |   |   |   |   |   |   | valuable |
| Coyne 47       | 2016 |                |    |   |   |   |   |   |   |   | valuable |
| Etienne 53     | 2016 |                |    |   |   |   |   |   |   |   | valuable |
| Coyne 45       | 2014 |                |    |   |   |   |   |   |   |   | valuable |
| Speksnijder 46 | 2014 |                |    |   |   |   |   |   |   |   | valuable |
| Redding 50     | 2014 |                |    |   | X |   | ? |   |   |   | valuable |
| Mateus 48      | 2014 |                |    |   | ? |   | ? |   |   |   | valuable |

\*Screening questions.

Empty cell: The study complied with this exploratory question.

Cell marked with X: The study did not comply with this exploratory question.

Cell marked with ?: We do not know whether the study complied with this exploratory question

10. How valuable is the research?: Valuable; Let us consider that the article provides valuable information regarding the explored research topic
